# Supplementary material for: COVID-19 patient serum-derived extracellular vesicles deliver miR-20b-5p induces neutrophil extracellular traps
Source: Springer Nature journal article supplement (doi:10.1186/s12964-025-02095-1), 2025-02-17
Supplement: MOESM1 [file 12964_2025_2095_MOESM1_ESM.pdf › 12964_2025_2095_MOESM1_ESM.pdf]

## SUPPLEMENTARY DATA

### Supplementary Figure

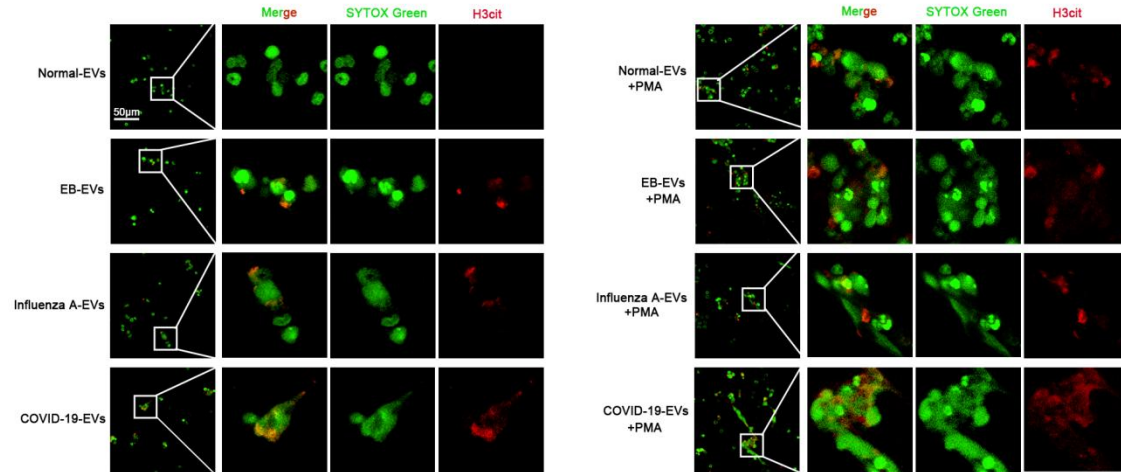

**Fig. S1 EVs derived from COVID-19 patients induced the formation of NETs.** Neutrophils were treated with Normal-EVs, EB-EVs, Influenza A-EVs, COVID-19-EVs, and phorbol-12-myristate-13-acetate (PMA), and neutrophil extracellular traps (NETs) were detected based on SYTOX Green and H3cit co-localization.
